# Supplementary material for: Mitigation of Gaseous Emissions from Stored Swine Manure with Biochar: Effect of Dose and Reapplication on A Pilot-Scale
Source: Preprints.org preprint supplement (doi:10.20944/preprints202012.0636.v1), 2020-12-24
Supplement: Supplementary file 1 [file supplementary]

## Supplementary Material

# Mitigation of gaseous emissions from stored swine manure with biochar: effect of dose and reapplication on a pilot-scale

Baitong Chen <sup>1</sup>, Jacek A. Koziel <sup>1,\*</sup>, Chumki Banik <sup>1</sup>, Hantian Ma <sup>2</sup>, Myeongseong Lee <sup>1,3</sup>, Samuel C. O'Brien <sup>1</sup>, Peiyang Li <sup>1</sup>, Daniel S. Andersen <sup>1</sup>, Andrzej Białowiec <sup>4,1</sup>, and Robert C. Brown <sup>5</sup>

<sup>1</sup> Department of Agricultural and Biosystems Engineering, Iowa State University, Ames, IA 50011, USA; [baitongc@iastate.edu](mailto:baitongc@iastate.edu) (B.C.); [cbanik@iastate.edu](mailto:cbanik@iastate.edu) (C.B.); [leefame@iastate.edu](mailto:leefame@iastate.edu) (M.L.); [scobrien@iastate.edu](mailto:scobrien@iastate.edu) (S.O.); [peiyangl@iastate.edu](mailto:peiyangl@iastate.edu) (P.L.); [dsa@iastate.edu](mailto:dsa@iastate.edu) (D.A.)

<sup>2</sup> Department of Civil, Construction and Environmental Engineering, Iowa State University, Ames, IA 50010, USA; [hantian2015@163.com](mailto:hantian2015@163.com) (H.M.)

<sup>3</sup> Department of Animal Biosystems Science, Chungnam National University, Daejeon 34134, Republic of Korea

<sup>4</sup> Department of Applied Bioeconomy, Wrocław University of Environmental and Life Sciences, 37a Chelmonskiego Str., 51-630 Wrocław, Poland; [andrzej.bialowiec@upwr.edu.pl](mailto:andrzej.bialowiec@upwr.edu.pl) (A.B.)

<sup>5</sup> Bioeconomy Institute and Department of Mechanical Engineering, Iowa State University, Ames, IA 50011, USA; [rcbrown3@iastate.edu](mailto:rcbrown3@iastate.edu) (R.B.)

\* Correspondence: Jacek Koziel, [koziel@iastate.edu](mailto:koziel@iastate.edu)

## Supplementary Figures and Tables

**Table S1:** Mitigation of NH<sub>3</sub> emissions utilizing different treatments with HAP biochar. Different letters indicate statistical significance.

| Treatment                              | Letters | Least Square Mean | Standard Error | Lower 95% | Upper 95% |
|----------------------------------------|---------|-------------------|----------------|-----------|-----------|
| Control                                | A       | 128               | 7.2            | 114       | 142       |
| 2 kg/m <sup>2</sup>                    | B       | 95                | 7.2            | 81        | 109       |
| 4 kg/m <sup>2</sup>                    | B       | 97                | 7.2            | 83        | 112       |
| 2 kg/m <sup>2</sup> with reapplication | B       | 75                | 7.2            | 61        | 89        |

**Table S2:** Mitigation of skatole peak area counts (PAC) utilizing different treatments of HAP biochar. A surrogate abundance of indole is represented by (PAC), i.e., peak area counts for indole in the headspace above manure measured by SPME and analyzed by GC-MS. PACs are arbitrary units of MS detector response.

| <b>Treatment</b>                       | <b>Letters</b> | <b>Least Square Mean</b> | <b>Standard Error</b> | <b>Lower 95%</b> | <b>Upper 95%</b> |
|----------------------------------------|----------------|--------------------------|-----------------------|------------------|------------------|
| Control                                | A              | 227,858                  | 25,594                | 177,027          | 278,690          |
| 2 kg/m <sup>2</sup>                    | B              | 131,396                  | 25,594                | 80,564           | 182,228          |
| 4 kg/m <sup>2</sup>                    | B              | 114,118                  | 25,594                | 63,286           | 164,949          |
| 2 kg/m <sup>2</sup> with reapplication | B              | 39,713                   | 25,594                | -11,119          | 90,545           |

**Table S3:** Mitigation of indole peak area counts (PAC) utilizing different treatments of HAP biochar. A surrogate abundance of indole is represented by (PAC), i.e., peak area counts for indole in the headspace above manure measured by SPME and analyzed by GC-MS. PACs are arbitrary units of MS detector response.

| <b>Treatment</b>                       | <b>Letters</b> | <b>Least Square Mean</b> | <b>Standard Error</b> | <b>Lower 95%</b> | <b>Upper 95%</b> |
|----------------------------------------|----------------|--------------------------|-----------------------|------------------|------------------|
| Control                                | A              | 4,680                    | 866                   | 2,961            | 6,399            |
| 2 kg/m <sup>2</sup>                    | AB             | 2,904                    | 866                   | 1,185            | 4,623            |
| 4 kg/m <sup>2</sup>                    | AB             | 2,991                    | 866                   | 1,272            | 4,710            |
| 2 kg/m <sup>2</sup> with reapplication | B              | 1,018                    | 866                   | -701             | 2,738            |

**Table S4:** Mitigation of phenol peak area counts (PAC) utilizing different treatments of HAP biochar. A surrogate abundance of indole is represented by (PAC), i.e., peak area counts for indole in the headspace above manure measured by SPME and analyzed by GC-MS. PACs are arbitrary units of MS detector response.

| <b>Treatment</b>                       | <b>Letters</b> | <b>Least Square Mean</b> | <b>Standard Error</b> | <b>Lower 95%</b> | <b>Upper 95%</b> |
|----------------------------------------|----------------|--------------------------|-----------------------|------------------|------------------|
| Control                                | A              | 302,851                  | 56,763                | 190,115          | 415,586          |
| 2 kg/m <sup>2</sup>                    | AB             | 216,538                  | 56,763                | 103,803          | 329,274          |
| 4 kg/m <sup>2</sup>                    | AB             | 136,187                  | 56,763                | 23,451           | 248,923          |
| 2 kg/m <sup>2</sup> with reapplication | B              | 27,534                   | 56,763                | -85,202          | 140,269          |

**Table S5:** Mitigation of p-cresol peak area counts (PAC) utilizing different treatments of HAP biochar. A surrogate abundance of indole is represented by (PAC), i.e., peak area counts for indole in the headspace above manure measured by SPME and analyzed by GC-MS. PACs are arbitrary units of MS detector response.

| <b>Treatment</b>                       | <b>Letters</b> | <b>Least Square Mean</b> | <b>Standard Error</b> | <b>Lower 95%</b> | <b>Upper 95%</b> |
|----------------------------------------|----------------|--------------------------|-----------------------|------------------|------------------|
| Control                                | AB             | 761,873                  | 218,426               | 328,061          | 1,195,685        |
| 2 kg/m <sup>2</sup>                    | AB             | 519,930                  | 218,426               | 86,118           | 953,742          |
| 4 kg/m <sup>2</sup>                    | A              | 1,062,317                | 218,426               | 628,505          | 1,496,129        |
| 2 kg/m <sup>2</sup> with reapplication | B              | 185,951                  | 218,426               | -247,861         | 619,763          |

**Table S6:** Mitigation of 4-ethyl phenol peak area counts (PAC) utilizing different treatments of HAP biochar. A surrogate abundance of indole is represented by (PAC), i.e., peak area counts for indole in the headspace above manure measured by SPME and analyzed by GC-MS. PACs are arbitrary units of MS detector response.

| <b>Treatment</b>                       | <b>Letters</b> | <b>Least Square Mean</b> | <b>Standard Error</b> | <b>Lower 95%</b> | <b>Upper 95%</b> |
|----------------------------------------|----------------|--------------------------|-----------------------|------------------|------------------|
| Control                                | A              | 160,294                  | 26,364                | 107,932          | 212,656          |
| 2 kg/m <sup>2</sup>                    | AB             | 104,543                  | 26,364                | 52,181           | 156,905          |
| 4 kg/m <sup>2</sup>                    | A              | 142,947                  | 26,364                | 90,585           | 195,309          |
| 2 kg/m <sup>2</sup> with reapplication | B              | 37,254                   | 26,364                | -15,108          | 89,616           |

**Table S7:** Mitigation of odor concentrations (OU/m<sup>3</sup>) utilizing different treatments with HAP biochar.

| <b>Treatment</b>                       | <b>Letters</b> | <b>Least Square Mean</b> | <b>Standard Error</b> | <b>Lower 95%</b> | <b>Upper 95%</b> |
|----------------------------------------|----------------|--------------------------|-----------------------|------------------|------------------|
| Control                                | A              | 3,102                    | 331                   | 2,445            | 3,759            |
| 2 kg/m <sup>2</sup>                    | A              | 2,756                    | 331                   | 2,099            | 3,412            |
| 4 kg/m <sup>2</sup>                    | A              | 2,971                    | 331                   | 2,315            | 3,628            |
| 2 kg/m <sup>2</sup> with reapplication | A              | 2,425                    | 331                   | 1,769            | 3,082            |

**Table S8:** Mitigation of CO<sub>2</sub> emissions utilizing different treatments of HAP biochar.

| <b>Treatment</b>                       | <b>Letters</b> | <b>Least Square Mean</b> | <b>Standard Error</b> | <b>Lower 95%</b> | <b>Upper 95%</b> |
|----------------------------------------|----------------|--------------------------|-----------------------|------------------|------------------|
| Control                                | A              | 2,090                    | 72                    | 1,947            | 2,233            |
| 2 kg/m <sup>2</sup>                    | A              | 2,084                    | 72                    | 1,941            | 2,227            |
| 4 kg/m <sup>2</sup>                    | A              | 2,113                    | 72                    | 1,970            | 2,256            |
| 2 kg/m <sup>2</sup> with reapplication | A              | 2,047                    | 72                    | 1,904            | 2,190            |

**Table S9:** Mitigation of CH<sub>4</sub> emissions utilizing different treatments of HAP biochar.

| <b>Treatment</b>                       | <b>Letters</b> | <b>Least Square Mean</b> | <b>Standard Error</b> | <b>Lower 95%</b> | <b>Upper 95%</b> |
|----------------------------------------|----------------|--------------------------|-----------------------|------------------|------------------|
| Control                                | A              | 347                      | 69                    | 210              | 483              |
| 2 kg/m <sup>2</sup>                    | A              | 397                      | 69                    | 261              | 534              |
| 4 kg/m <sup>2</sup>                    | A              | 401                      | 69                    | 265              | 538              |
| 2 kg/m <sup>2</sup> with reapplication | A              | 506                      | 69                    | 370              | 643              |

**Table S10:** Mitigation of N<sub>2</sub>O emissions utilizing different treatments of HAP biochar.

| <b>Treatment</b>                       | <b>Letters</b> | <b>Least Square Mean</b> | <b>Standard Error</b> | <b>Lower 95%</b> | <b>Upper 95%</b> |
|----------------------------------------|----------------|--------------------------|-----------------------|------------------|------------------|
| Control                                | A              | 0.9                      | 0.1                   | 0.8              | 1.0              |
| 2 kg/m <sup>2</sup>                    | A              | 0.9                      | 0.1                   | 0.8              | 1.0              |
| 4 kg/m <sup>2</sup>                    | A              | 0.8                      | 0.1                   | 0.7              | 1.0              |
| 2 kg/m <sup>2</sup> with reapplication | A              | 0.8                      | 0.1                   | 0.7              | 0.9              |

## Supplementary Figures

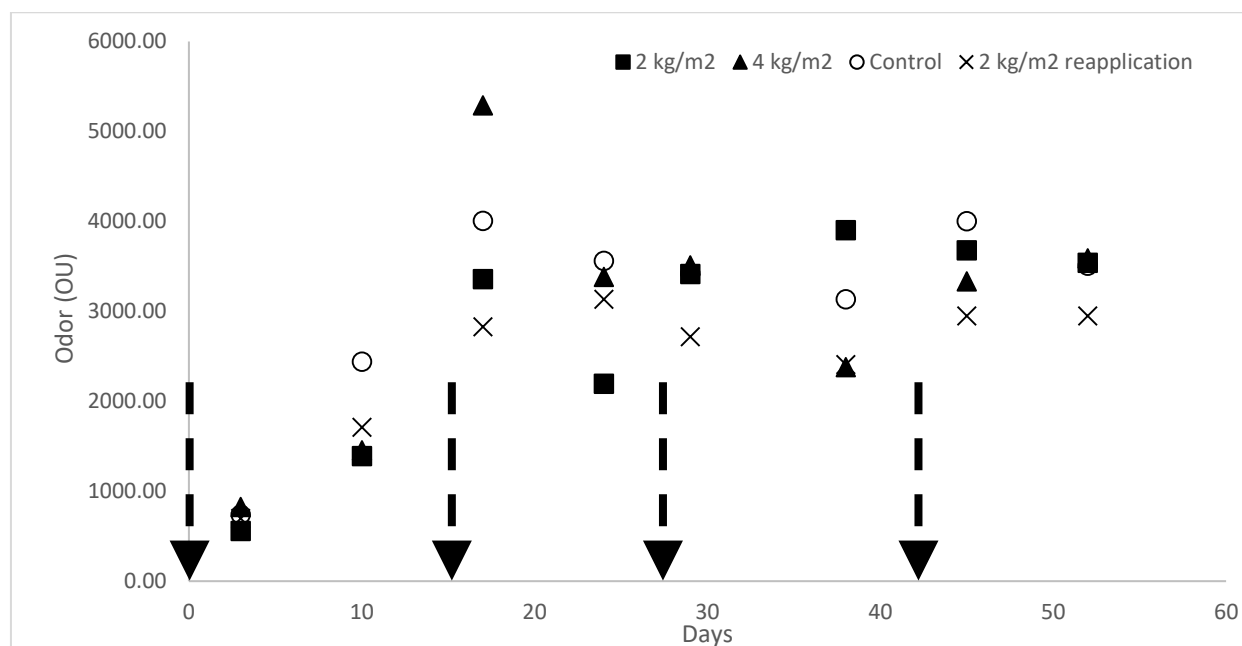

**Figure S1:** Mitigation of odor emissions from swine manure treated with biochar – effects of one-time dose (2 & 4 kg/m<sup>2</sup>) and 2 kg/m<sup>2</sup> bi-weekly reapplication. Vertical arrows represent the application or reapplication of biochar and manure to storage simulators. Each data point represents the mean of (n=3) measurements.

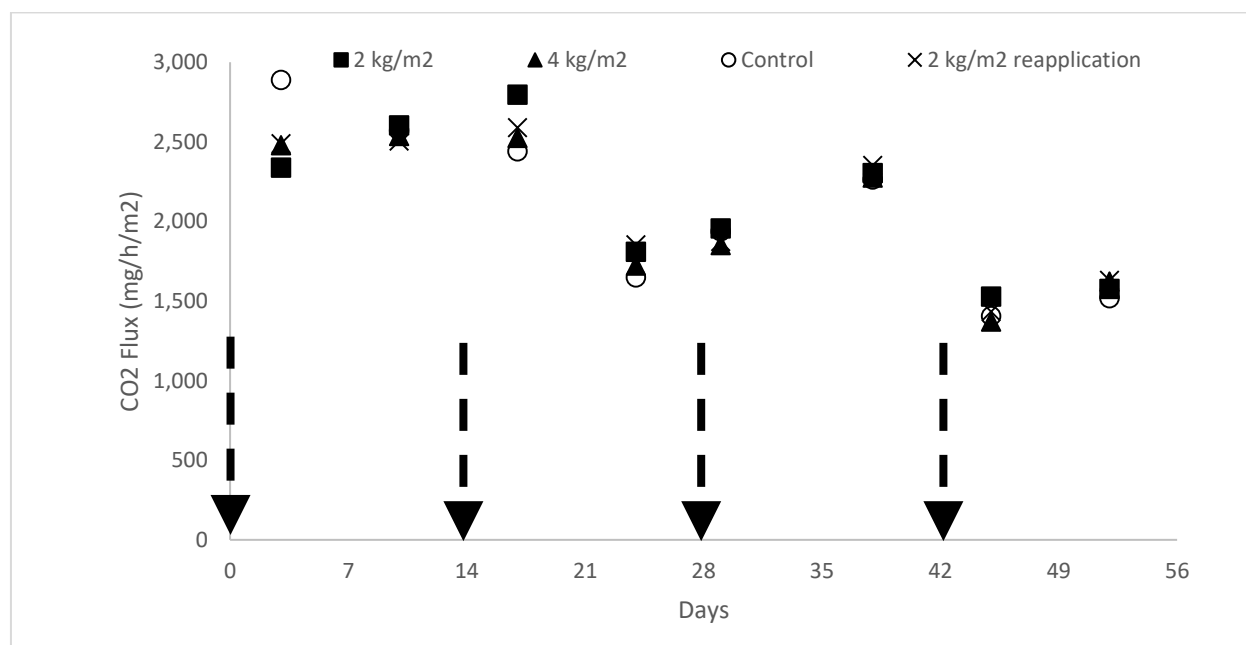

**Figure S2:** Mitigation of CO<sub>2</sub> emissions from swine manure treated with biochar – effects of one-time dose (2 & 4 kg/m<sup>2</sup>) and 2 kg/m<sup>2</sup> bi-weekly reapplication. Vertical arrows represent the application or reapplication of biochar and manure to storage simulators. Each data point represents the mean of (n=3) measurements.

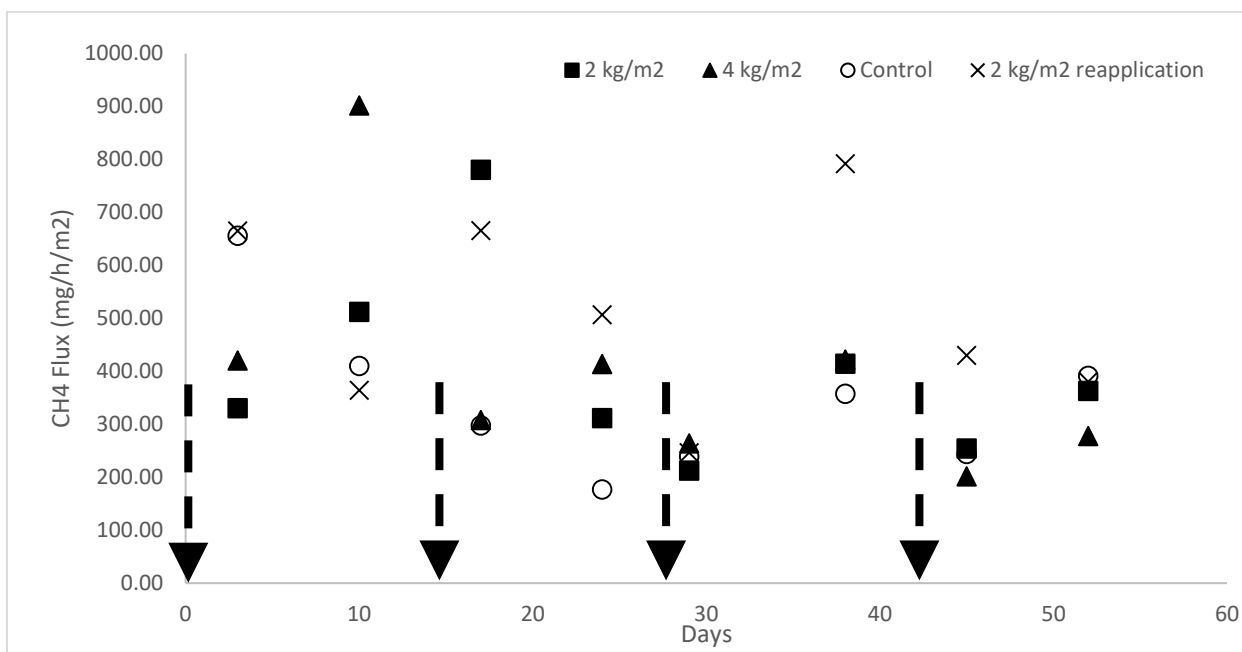

**Figure S3:** Mitigation of CH<sub>4</sub> emissions from swine manure treated with biochar – effects of one-time dose (2 & 4 kg/m<sup>2</sup>) and 2 kg/m<sup>2</sup> bi-weekly reapplication. Vertical arrows represent the application or reapplication of biochar and manure to storage simulators. Each data point represents the mean of (n=3) measurements.

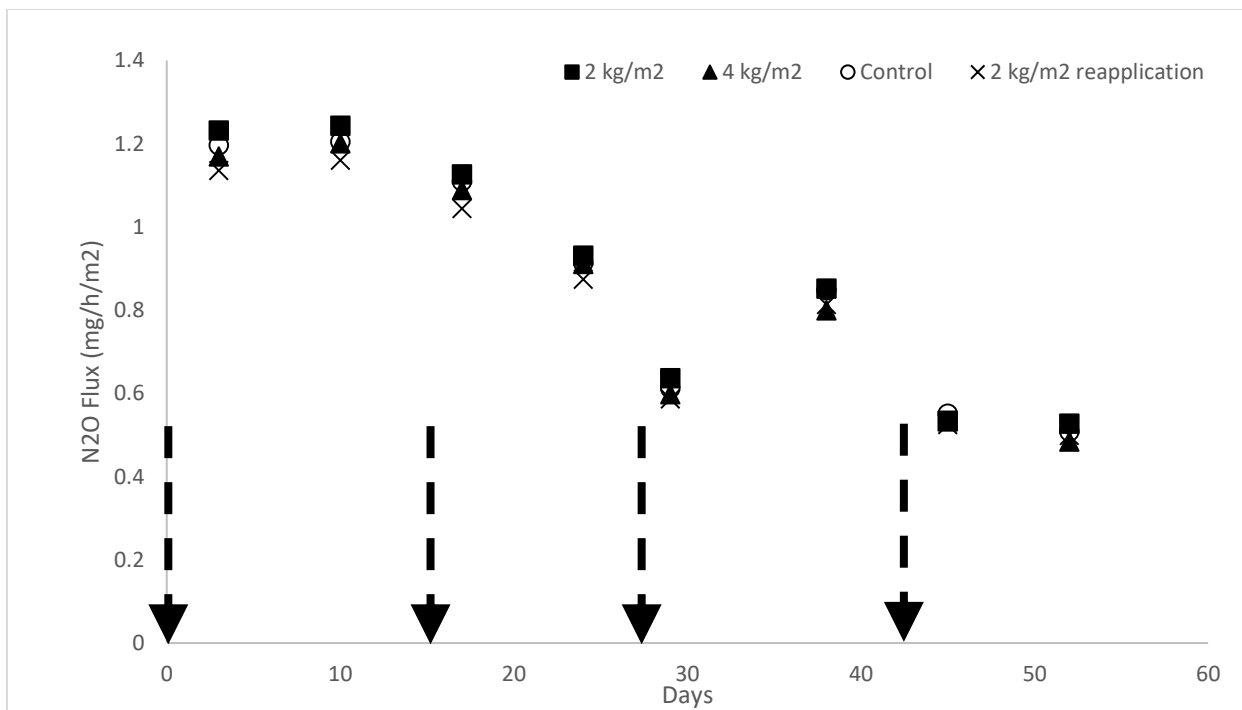

**Figure S4:** Mitigation of N<sub>2</sub>O emissions from swine manure treated with biochar – effects of one-time dose (2 & 4 kg/m<sup>2</sup>) and 2 kg/m<sup>2</sup> bi-weekly reapplication. Vertical arrows represent the application or reapplication of biochar and manure to storage simulators. Each data point represents the mean of (n=3) measurements.
